# Supplementary material for: One-pot synthesis of trisubstituted ureas from α-chloroaldoxime O-methanesulfonates and secondary amines
Source: Royal Society of Chemistry journal article supplement (doi:10.1039/c5ra10060g), 2015-01-01

**One-Pot Synthesis of Trisubstituted Ureas from  $\alpha$ -Chloroaldoxime *O*-Methanesulfonates and  
Secondary Amines**

Juthanat kaebamrung\*, Asan Lanui, Sirinad Mahawong, Witthawin Duangmak and  
Vatcharin Rukachaisirikul

*Department of Chemistry and Center of Excellence for Innovation in Chemistry, Faculty of Science,  
Prince of Songkla University, Hat Yai, Songkhla 90112, Thailand*

E-mail: [juthanat.k@psu.ac.th](mailto:juthanat.k@psu.ac.th)

Supporting Information

<sup>1</sup>H and <sup>13</sup>C NMR Spectra of New Compounds.....S2

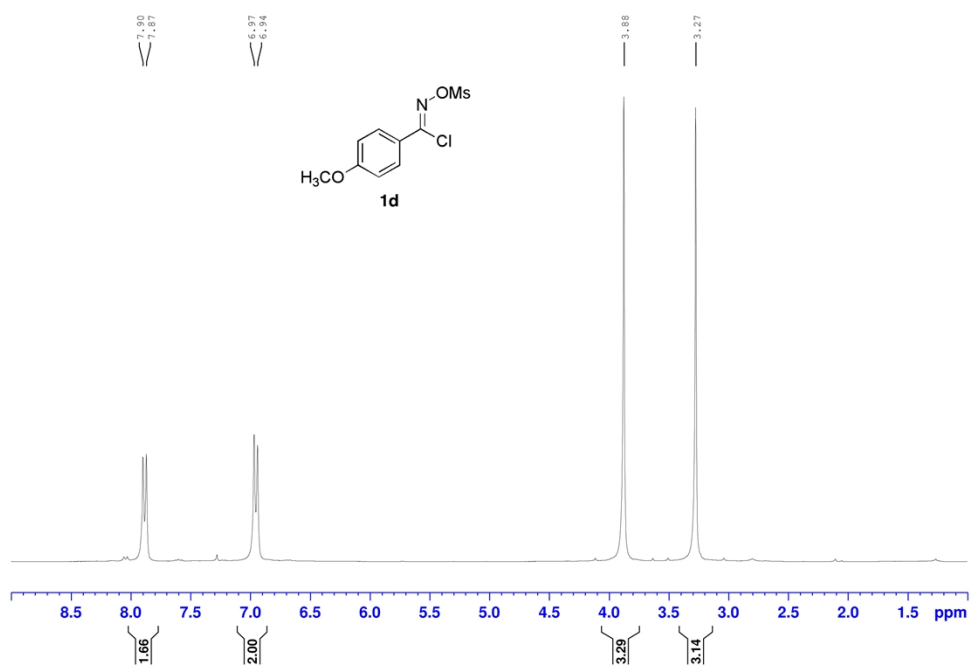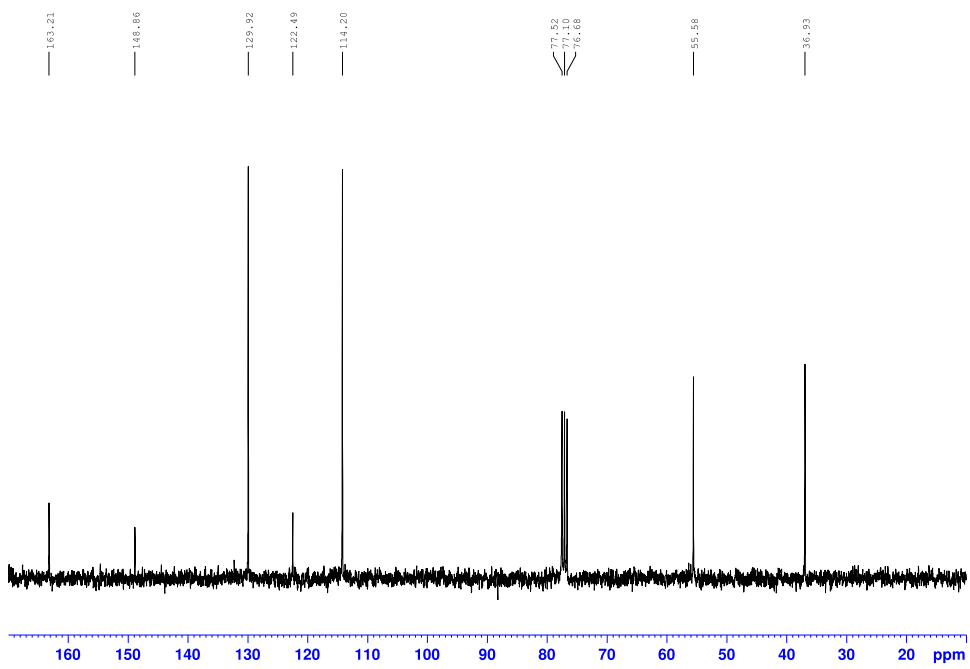

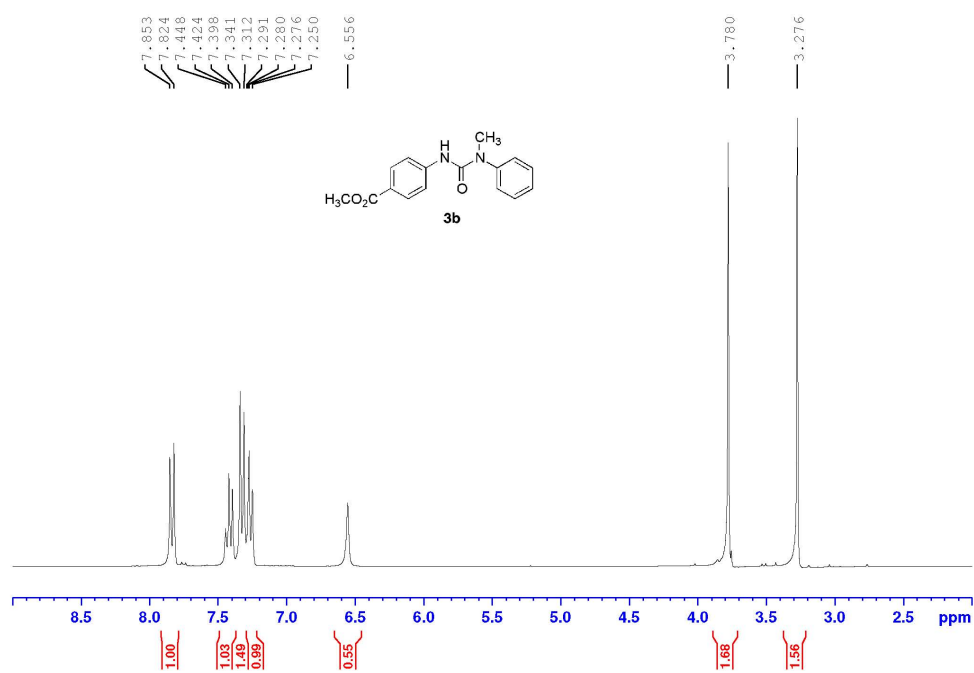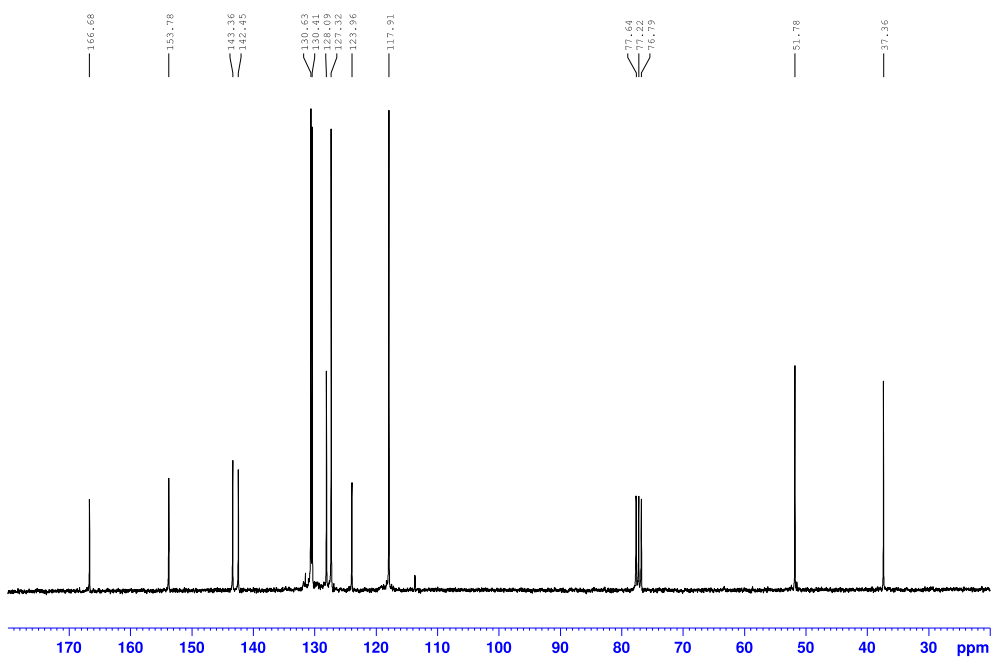

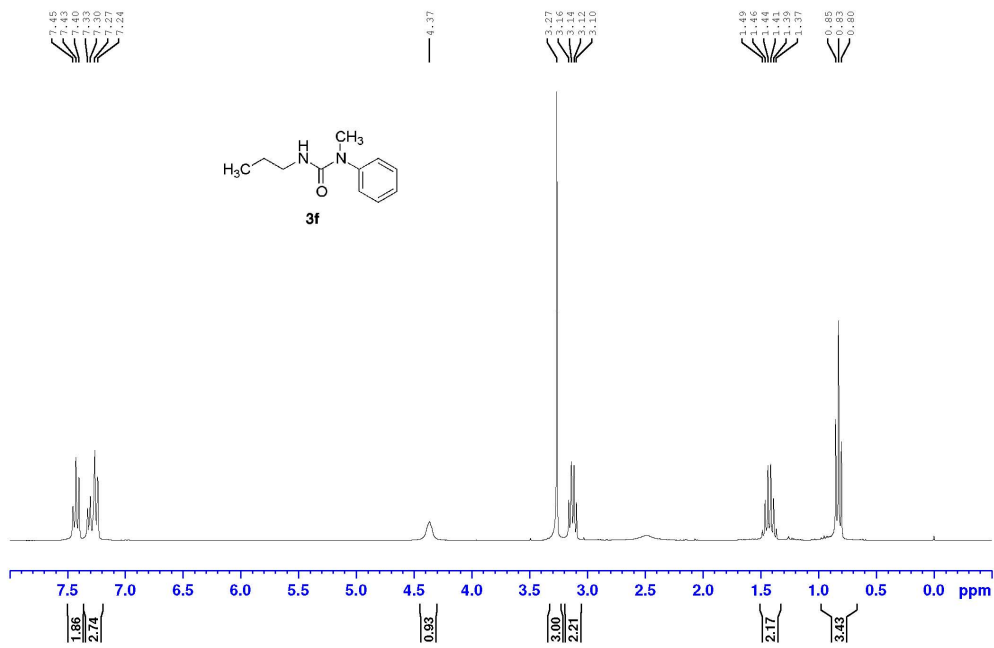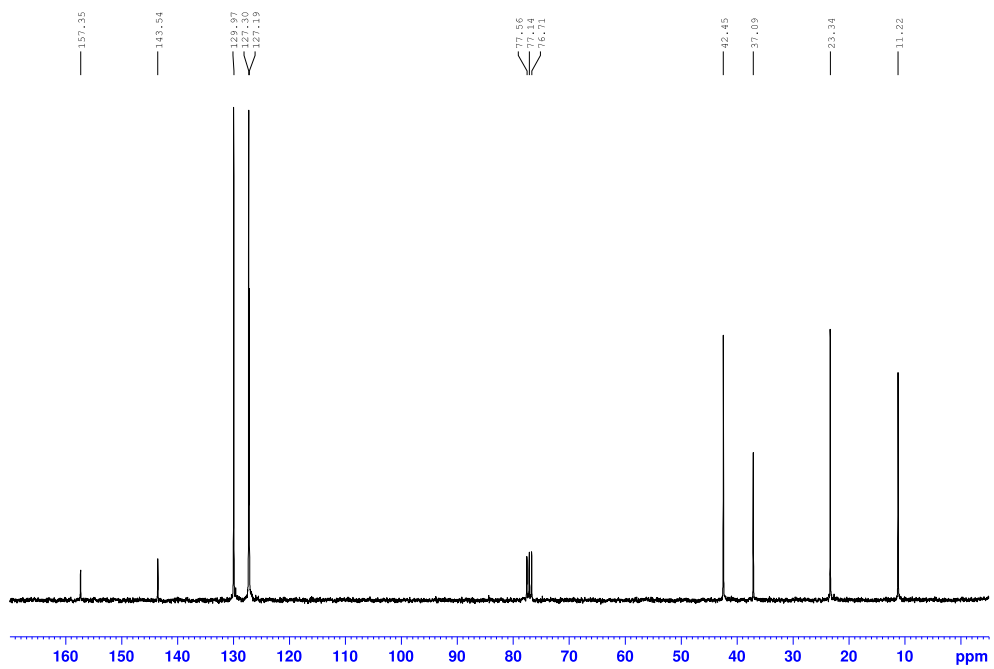

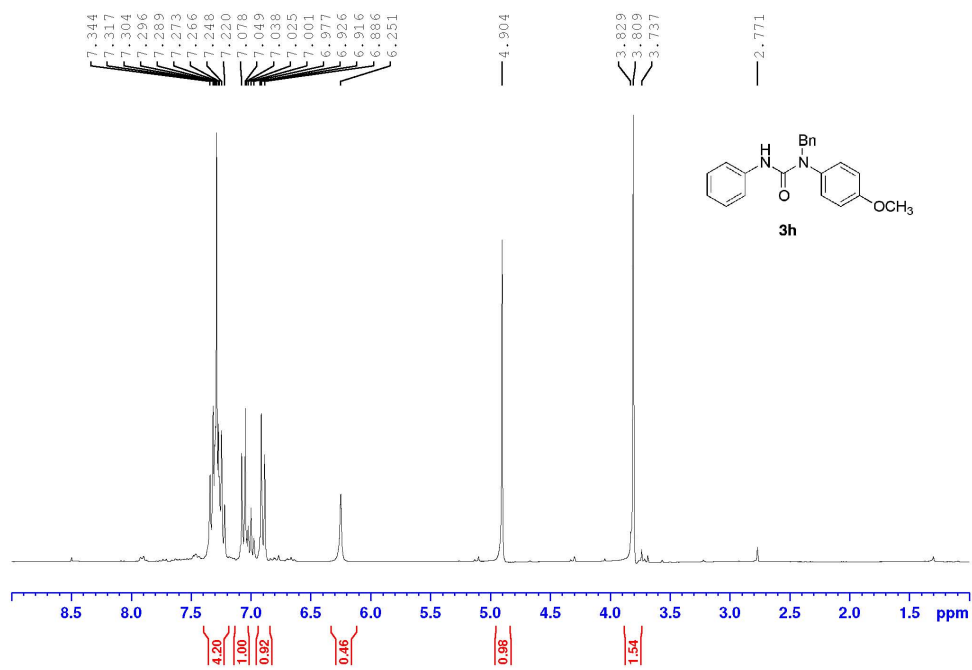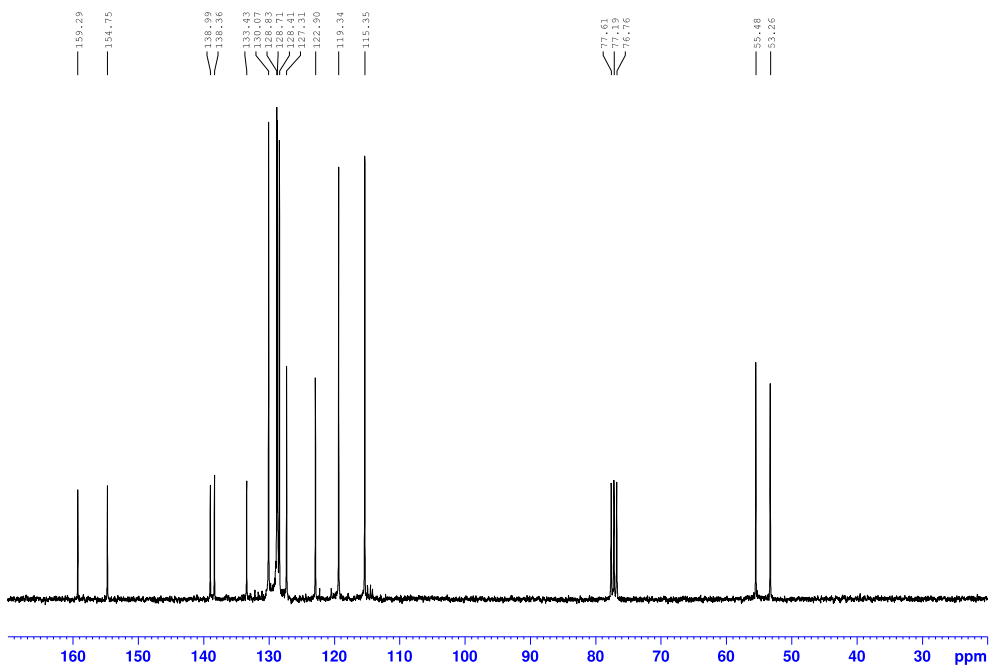

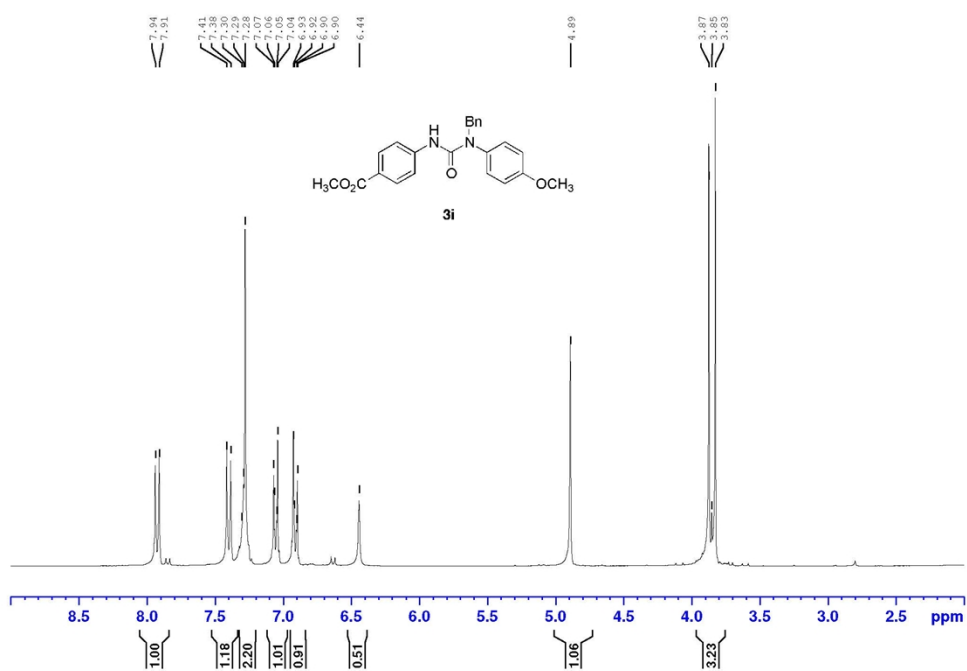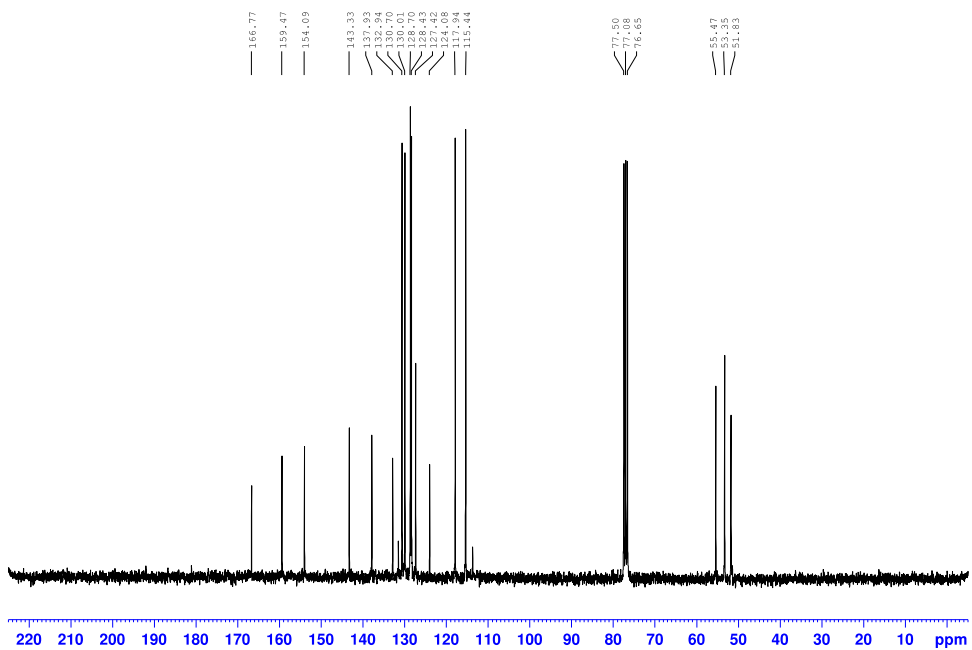

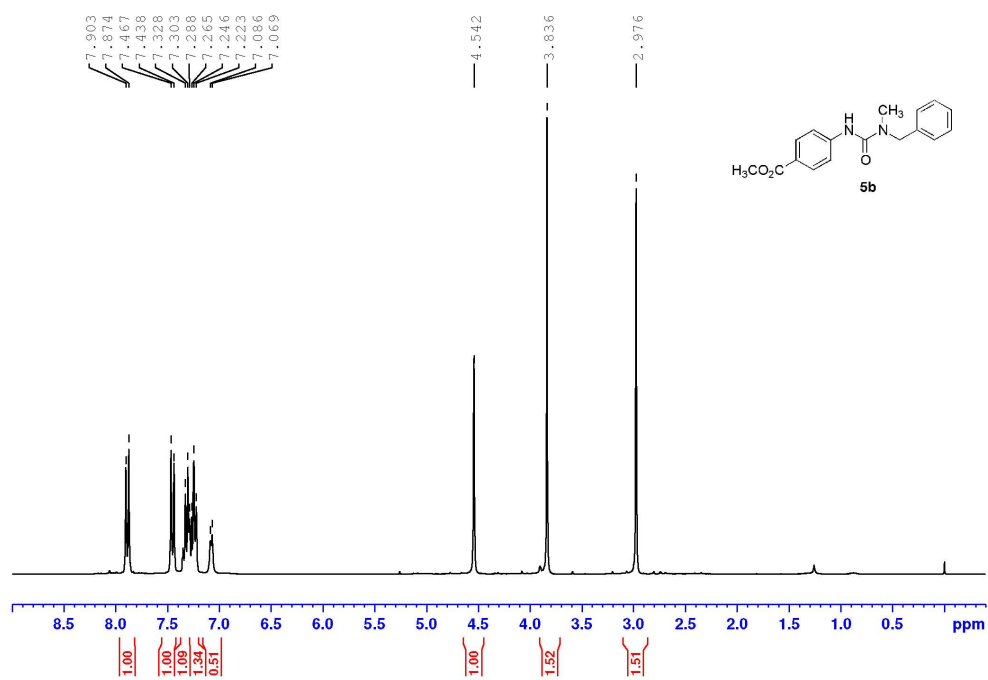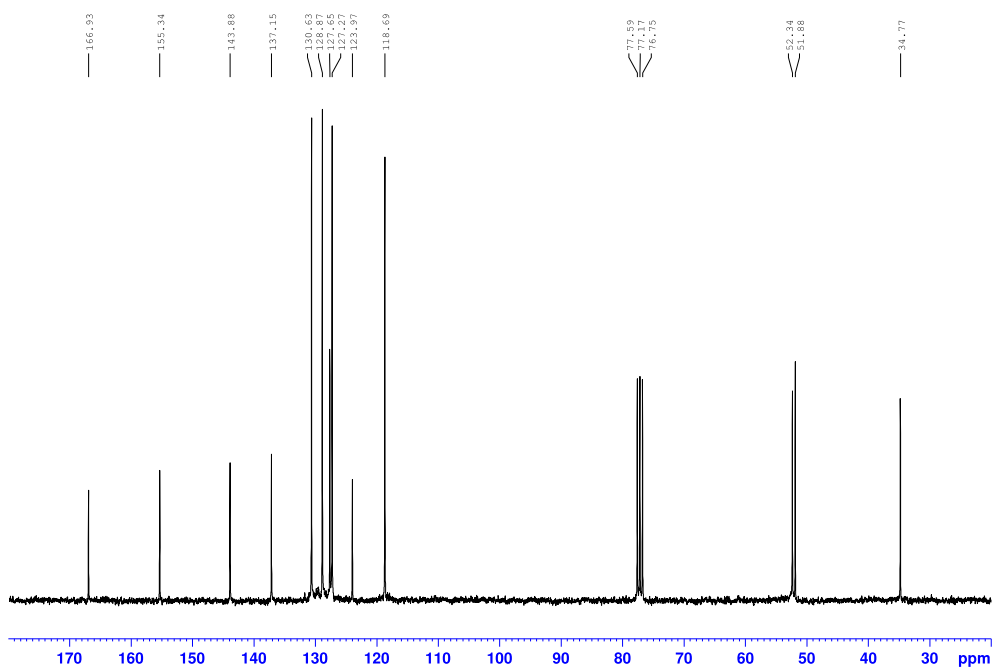

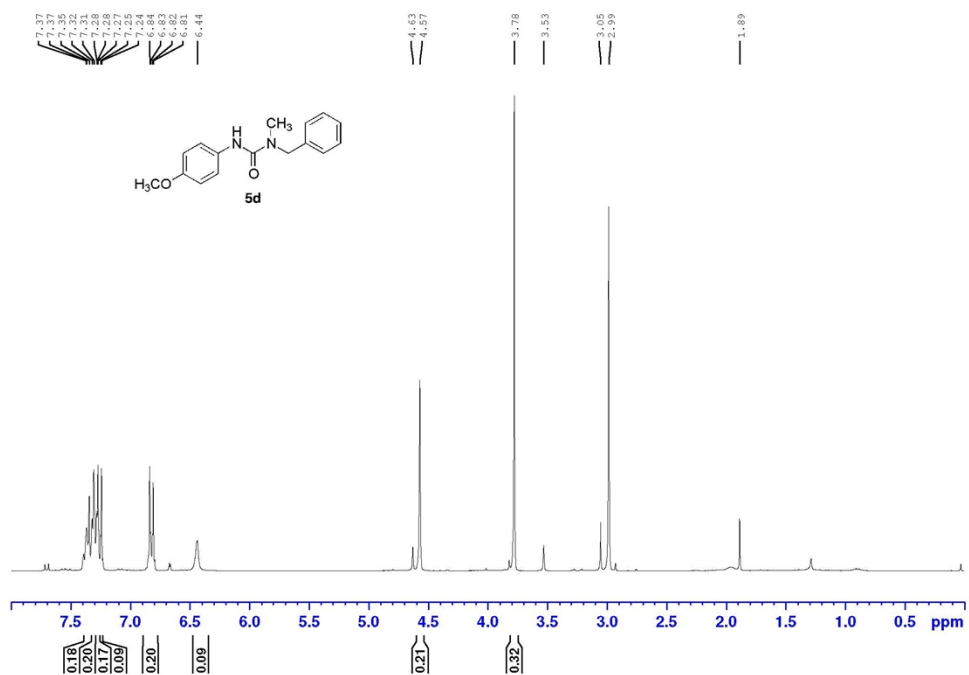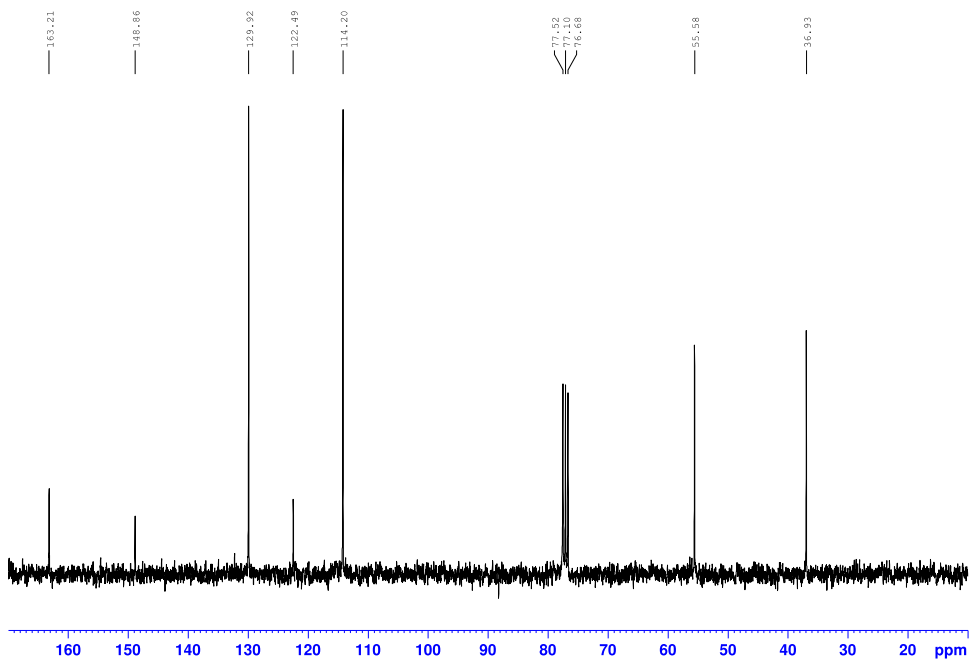



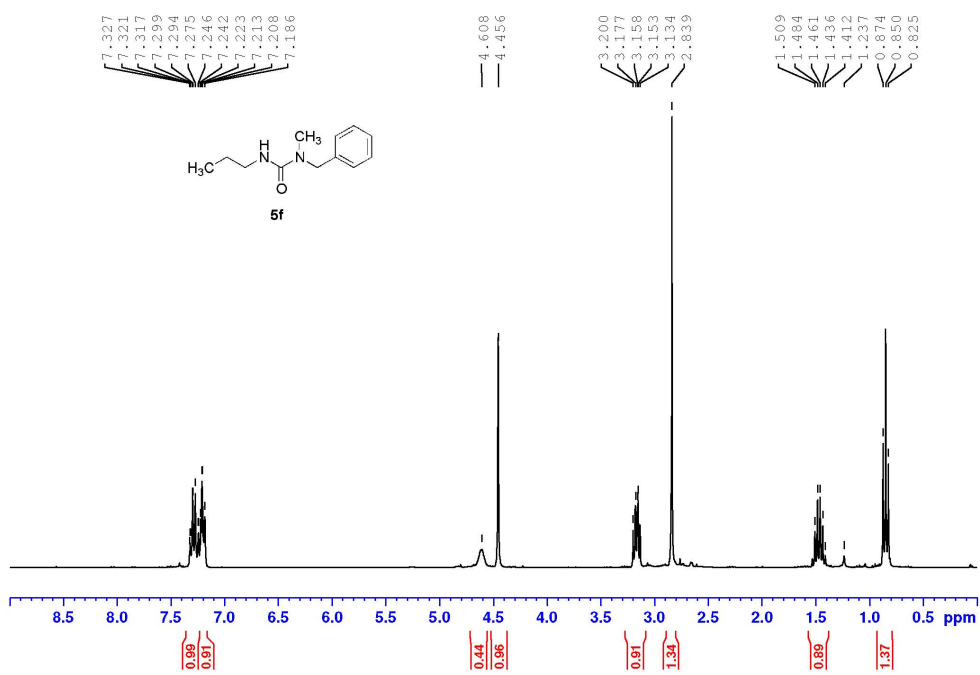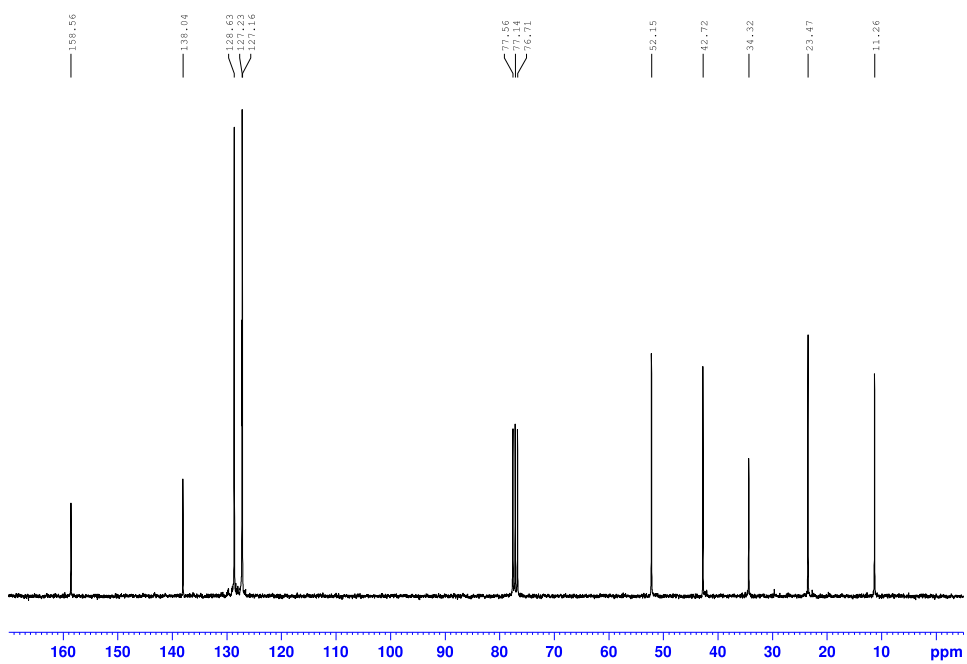

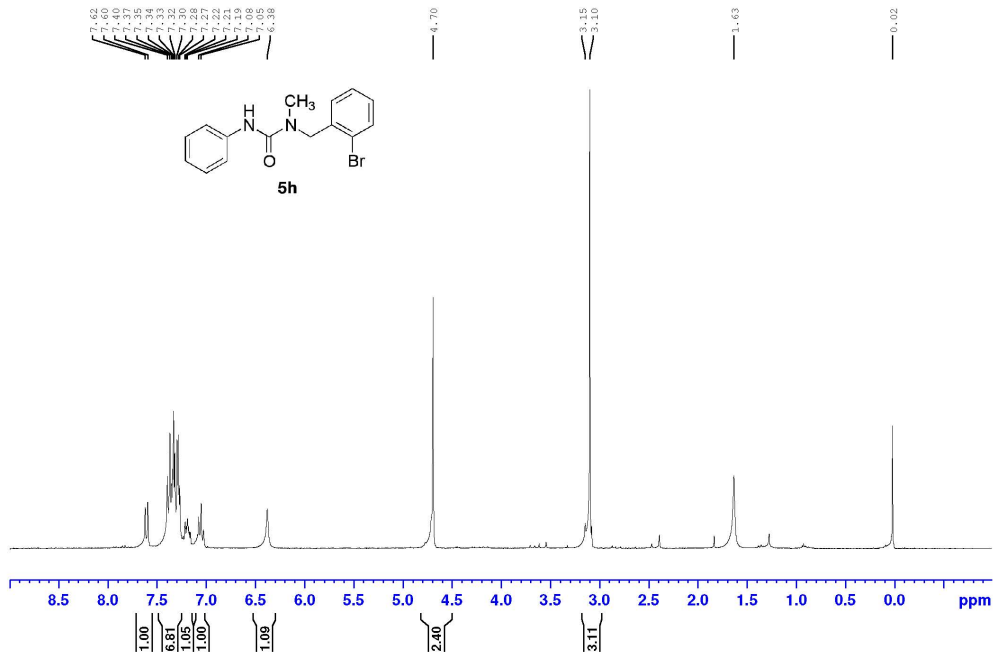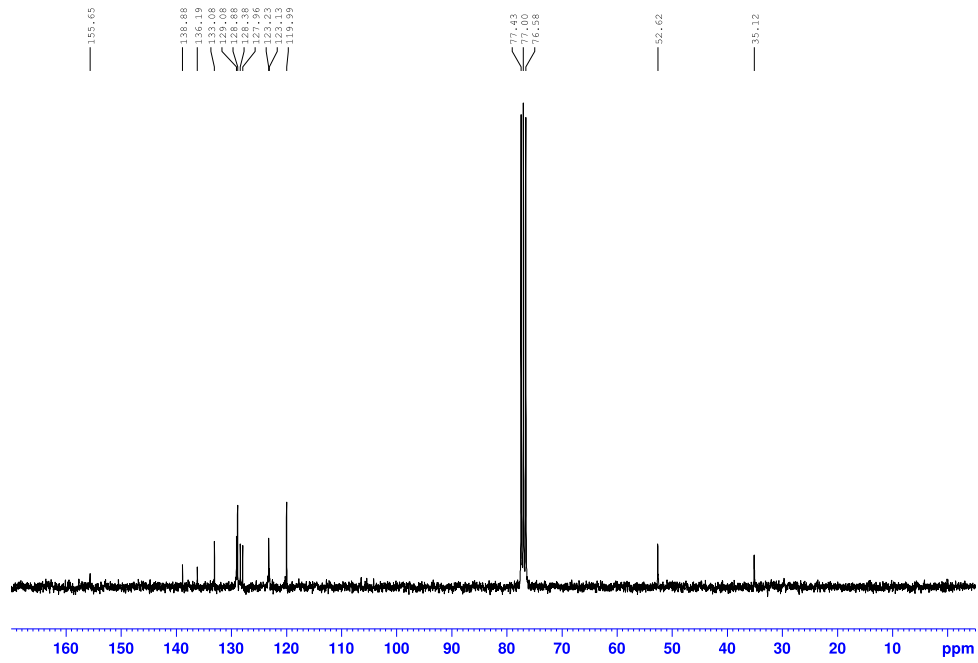

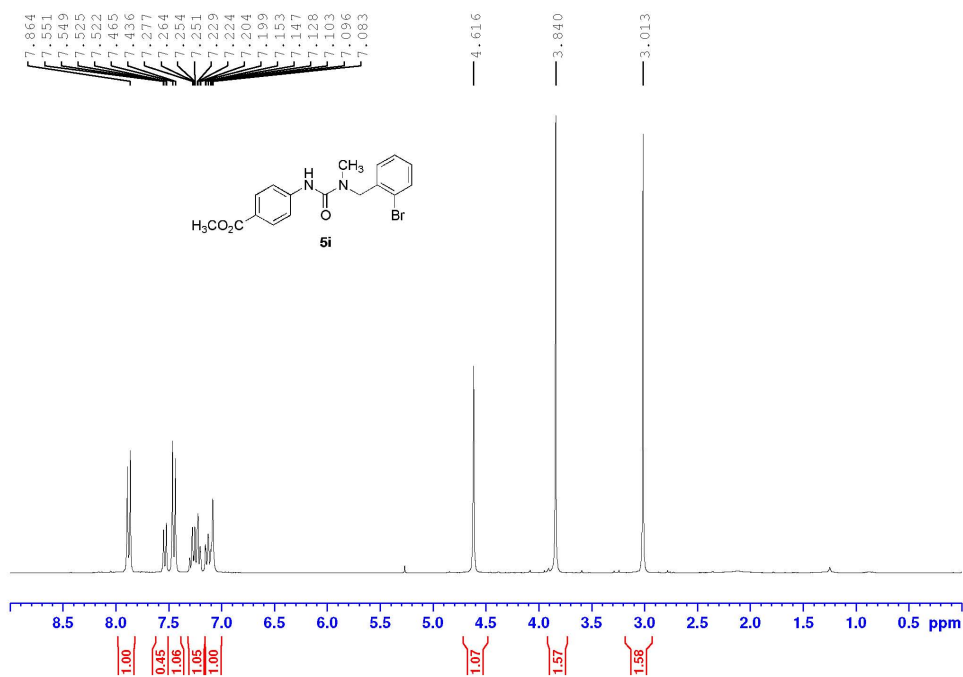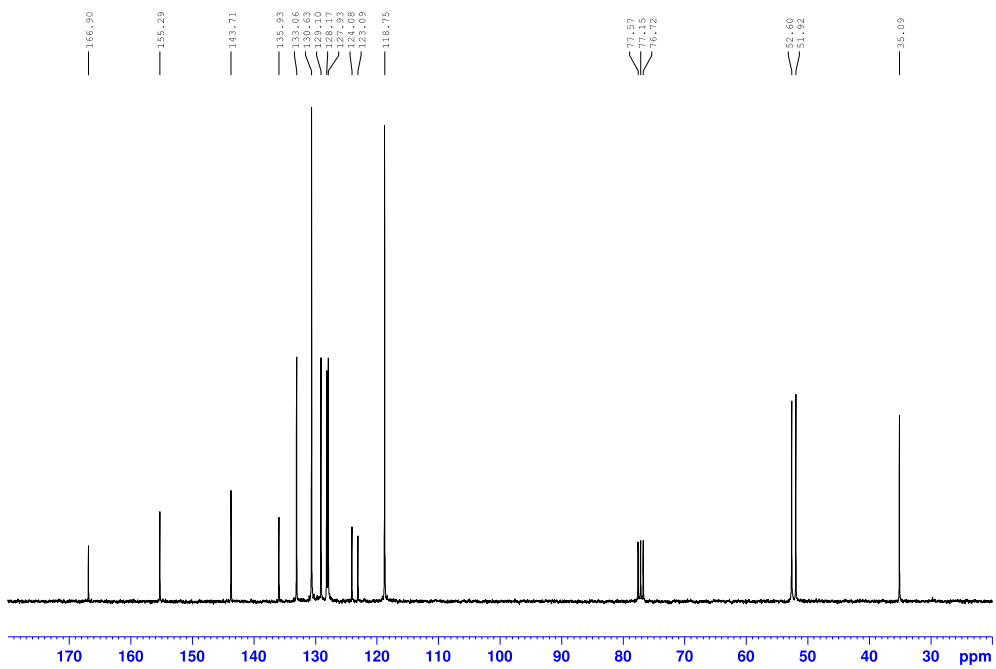

Supplement: c5ra10060g1.pdf [file c5ra10060g1.pdf]
